# Supplementary material
Source: publisher figshare collection journal article supplement (https://aacr.figshare.com/articles/dataset/_/23274972)
Supplement: Supplementary file 1 [file 41022609]

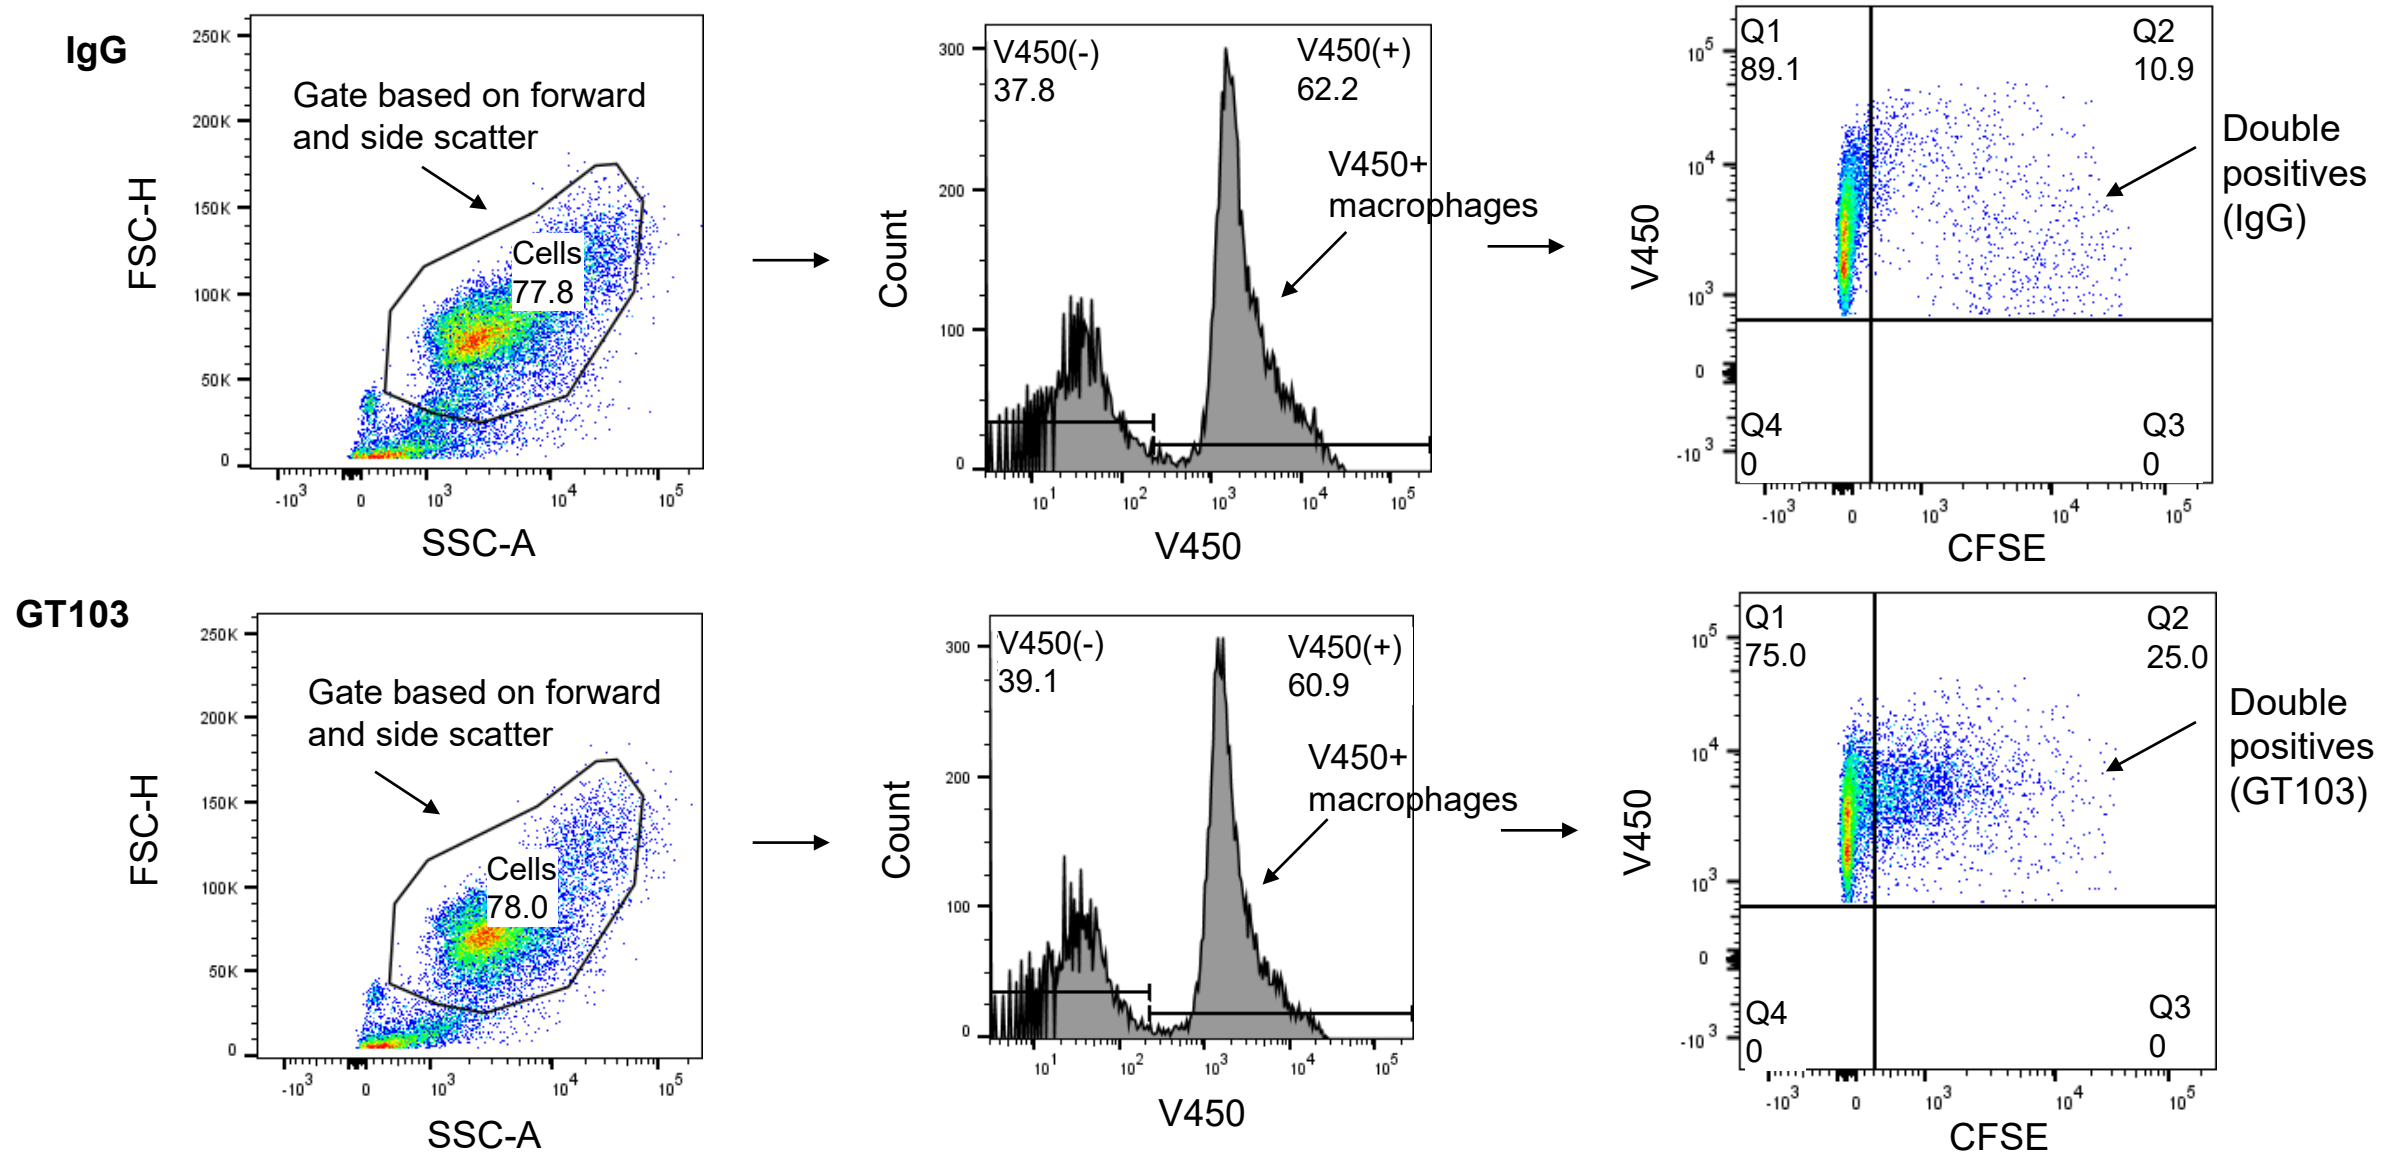

**Figure S4. Gating strategy for detection of ADCP.** The plots for **Figure 3H** are derived from a flow cytometry experiment in which the initial gate for total cells was based on forward scatter (FSC-H) and side scatter (SSC-A) to omit any cell debris. Macrophages were then selected by gating for cell trace violet (V450) positive cells as shown in the histograms of the middle panels, and ADCP was determined by gating for double positive V450-labeled macrophages and CFSE-labeled tumor cells as shown in the last panels. In these ADCP reactions (one set of duplicates), GT103 caused a greater than 2-fold increase in double positive cells compared to control IgG (25% vs 10.9%).
